# Supplementary material
Source: PubMed Central journal article supplement (PMC5616186)
Supplement: NIHMS902488-supplement-FigureS6.pdf [file NIHMS902488-supplement-FigureS6.pdf]

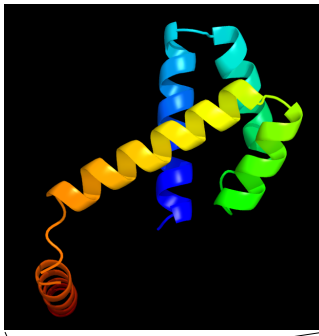

Cre16.g655050

RbcX domain

Predicted disordered

| Phyre2 template | Confidence | % ID | PDB Title/Family                                                    |
|-----------------|------------|------|---------------------------------------------------------------------|
| c4gr6B          | 97.5       | 25   | Crystal structure of AtRbcX2 from <i>arabidopsis thaliana</i>       |
| d2py8a1         | 97.1       | 30   | RbcX-like                                                           |
| d2peqa1         | 96.7       | 31   | RbcX-like                                                           |
| c2py8B          | 96.6       | 33   | RbcX                                                                |
| d2peoa1         | 96.6       | 28   | RbcX-like                                                           |
| c2peoA          | 96.6       | 28   | Crystal structure of RbcX from <i>Anabaena</i> CA                   |
| c2penE          | 96.6       | 31   | Crystal structure of RbcX, crystal form i                           |
| c3ka1A          | 96.5       | 25   | Crystal structure of RbcX from <i>Thermosynechococcus elongatus</i> |
| c4gr2A          | 95.7       | 19   | Structure of AtRbcX1 from <i>Arabidopsis thaliana</i>               |
| c4whjA          | 95.3       | 9    | Myxovirus resistance protein 2 (mxh)                                |
