# Supplementary material
Source: PubMed Central journal article supplement (PMC5616186)
Supplement: NIHMS902488-supplement-TablesS4.pdf [file NIHMS902488-supplement-TablesS4.pdf]

**Table S2. Proteins That Showed Multiple Localizations, Related to Figure 2**

| Phytozome v5.5<br>(Augustus u111.6)<br>ID | Name  | Localization                      | Predalga<br>predicted<br>localization | Putative function                            | Predicted<br>Mw |
|-------------------------------------------|-------|-----------------------------------|---------------------------------------|----------------------------------------------|-----------------|
| Cre09.g416800                             | -     | Cytosol and chloroplast           | O                                     | -                                            | 22.78           |
| Cre12.g552450                             | -     | Cytosol and chloroplast           | O                                     | -                                            | 11.85           |
| Cre16.g685000                             | -     | Cytosol and chloroplast           | C                                     | -                                            | 25.67           |
| Cre07.g334800                             | FDX4  | Cytosol and chloroplast           | C                                     | Ferredoxin                                   | 14.05           |
| Cre09.g396400                             | UBQ2  | Flagella and cytosol              | O                                     | Bi-ubiquitin                                 | 17.2            |
| Cre03.g204577                             | DNJ31 | Flagella and cytosol              | C                                     | DnaJ-like protein                            | 61.75           |
| Cre07.g321800                             | -     | Flagella and cytosol              | O                                     | -                                            | 24.88           |
| Cre11.g467617                             | LCI19 | Flagella and cytosol              | O                                     | Gamma hydroxybutyrate<br>dehydrogenase       | 30.24           |
| Cre16.g685050                             | LCI15 | Flagella and cytosol              | C                                     | PRLI-interacting factor L                    | 34.34           |
| Cre03.g158000                             | GSA1  | Flagella, chloroplast and cytosol | C                                     | Glutamate-1-semialdehyde<br>aminotransferase | 49.23           |
| Cre17.g725500                             | -     | Flagella, chloroplast and cytosol | C                                     | -                                            | 13.82           |
| Cre07.g337100                             | -     | Flagella and mitochondria         | C                                     | -                                            | 10.75           |

**Table S3. Proteins Used as Baits for the AP-MS Study, Related to Figure 5**

| Phytozome JGI v5.5 (Augustus u111.6) ID | Name       | Protein description                            | Localization                                      | Replica type (Biological, BR; Affinity Purification AR; Mass Spectrometry, MR) | Replica 1 MS ID | Replica 2 MS ID | Number of Preys with WD-score >1 | Number of HCIPs (WD-score >47.52) |
|-----------------------------------------|------------|------------------------------------------------|---------------------------------------------------|--------------------------------------------------------------------------------|-----------------|-----------------|----------------------------------|-----------------------------------|
| Cre01.g051500                           | ULP1       | Uncharacterized thylakoid luminal polypeptide  | Chloroplast not homogeneous with pyrenoid signal  | MR                                                                             | MAP30           | T3B08           | 179                              | 1                                 |
| Cre01.g054850                           | -          | -                                              | Chloroplast not homogeneous with pyrenoid signal  | AR                                                                             | MAP17           | T1D03           | 211                              | 6                                 |
| Cre02.g097800                           | HLA3       | ABC transporter                                | Plasma membrane and late-secretory pathway        | AR                                                                             | MAP12           | T2F06           | 372                              | 36                                |
| Cre02.g120100                           | RBCS1      | Rubisco small subunit 1                        | Pyrenoid matrix                                   | BR                                                                             | MAP23           | T1D08           | 81                               | 19                                |
| Cre02.g120150                           | RBCS2      | Rubisco small subunit 2                        | Pyrenoid matrix                                   | AR                                                                             | MAP14           | T2H06           | 104                              | 20                                |
| Cre03.g151650                           | SMM7       | -                                              | Pyrenoid matrix                                   | AR                                                                             | MAP2            | T1A12           | 303                              | 5                                 |
| Cre03.g162800                           | LCI1       | Low-CO2-inducible membrane protein             | Plasma membrane and late-secretory pathway        | AR                                                                             | MAP11           | T1E12           | 266                              | 7                                 |
| Cre03.g179800                           | LCI24      | Low-CO2-inducible membrane protein             | Chloroplast homogeneous with pyrenoid signal      | AR                                                                             | MAP28           | T2D06           | 249                              | 3                                 |
| Cre03.g191250                           | LCI34      | Low-CO2-inducible protein                      | Chloroplast not homogeneous with pyrenoid signal  | AR                                                                             | MAP6            | T2F03           | 239                              | 5                                 |
| Cre04.g223050                           | CAH2       | Carbonic anhydrase, alpha type, periplasmic    | ER                                                | MR                                                                             | MAP1            | T1A07           | 323                              | 34                                |
| Cre04.g223300                           | CCP1       | Low-CO2-inducible chloroplast envelope protein | Mitochondria                                      | AR                                                                             | MAP22           | T1C07           | 328                              | 48                                |
| Cre04.g229300                           | RCA1       | Rubisco activase                               | Pyrenoid matrix                                   | AR                                                                             | T3E8            | T3E08           | 463                              | 26                                |
| Cre05.g248450                           | CAH5       | Mitochondrial carbonic anhydrase               | Mitochondria                                      | BR                                                                             | MAP18           | T1F02           | 290                              | 19                                |
| Cre06.g283750                           | HST1       | Homogentisate solanesyltransferase             | Chloroplast not homogeneous with pyrenoid signal  | AR                                                                             | MAP32           | T2F11           | 309                              | 22                                |
| Cre06.g295450                           | HPR1       | Hydroxypyruvate reductase                      | Mitochondria                                      | MR                                                                             | MAP21           | T5D02           | 162                              | 12                                |
| Cre06.g307500                           | LCIC       | Low-CO2 inducible protein                      | Pyrenoid periphery punctate                       | MR                                                                             | MAP4            | T1C02           | 113                              | 6                                 |
| Cre06.g309000                           | LCIA       | Anion transporter                              | Chloroplast envelope plus chloroplast homogeneous | AR                                                                             | MAP9            | T1C05           | 393                              | 43                                |
| Cre07.g330250                           | PSAH       | Subunit H of photosystem I                     | Pyrenoid tubules                                  | AR                                                                             | T2D2            | T2D02           | 351                              | 2                                 |
| Cre08.g362900                           | PSBP4      | Luminal PsbP-like protein                      | Pyrenoid periphery punctate                       | AR                                                                             | MAP35           | T3F12           | 234                              | 24                                |
| Cre08.g372450                           | PSBQ       | Oxygen-evolving enhancer protein 3             | Chloroplast not homogeneous with pyrenoid signal  | AR                                                                             | MAP20           | T3B04           | 134                              | 3                                 |
| Cre09.g394473                           | LCI9       | Low-CO2-inducible protein                      | Pyrenoid periphery mesh                           | MR                                                                             | T1E6            | T1E06           | 200                              | 4                                 |
| Cre09.g415700                           | CAH3       | Carbonic anhydrase 3                           | Chloroplast homogeneous with pyrenoid signal      | AR                                                                             | T1E9            | T1E09           | 500                              | 11                                |
| Cre10.g436550                           | EPYC1/LCI5 | Low-CO2-inducible protein                      | Pyrenoid matrix                                   | BR                                                                             | LCI5MAP         | T1C11           | 146                              | 9                                 |
| Cre10.g444700                           | SBE3       | Starch branching enzyme                        | Pyrenoid periphery spherical                      | AR                                                                             | MAP7            | T2F05           | 212                              | 4                                 |
| Cre10.g452800                           | LCIB       | Low-CO2-inducible protein                      | Pyrenoid periphery punctate                       | AR                                                                             | T1E11           | T1E11           | 136                              | 3                                 |
| Cre12.g485050                           | CAH6       | Carbonic anhydrase 6                           | Flagella                                          | MR                                                                             | MAP5            | T1D07           | 190                              | 4                                 |
| Cre12.g507300                           | LCI30      | Low-CO2-inducible protein                      | Nucleus                                           | MR                                                                             | MAP27           | T2C11           | 320                              | 34                                |
| Cre12.g509050                           | PSBP3      | OEE2-like protein of thylakoid lumen           | Chloroplast not homogeneous with pyrenoid signal  | AR                                                                             | MAP25           | T3G08           | 245                              | 10                                |
| Cre12.g519300                           | TEF9       | Predicted protein                              | Chloroplast homogeneous with pyrenoid signal      | MR                                                                             | MAP31           | T1D04           | 180                              | 1                                 |
| Cre12.g560950                           | PSAG       | Photosystem I reaction center subunit V        | Chloroplast not homogeneous with pyrenoid signal  | AR                                                                             | MAP33           | T3B03           | 145                              | 2                                 |
| Cre13.g577100                           | ACP2       | Acyl-carrier protein                           | Chloroplast not homogeneous with pyrenoid signal  | MR                                                                             | MAP19           | T3B02           | 189                              | 26                                |
| Cre14.g626700                           | Fd/FDX1    | Ferredoxin                                     | Chloroplast not homogeneous with pyrenoid signal  | AR                                                                             | MAP29           | T2D10           | 199                              | 20                                |
| Cre16.g651050                           | CYC6       | Cytochrome c <sub>6</sub>                      | Chloroplast not homogeneous with pyrenoid signal  | AR                                                                             | MAP10           | T1D12           | 288                              | 7                                 |
| Cre16.g652800                           | -          | -                                              | Chloroplast homogeneous with pyrenoid signal      | AR                                                                             | MAP15           | T1C01           | 281                              | 2                                 |
| Cre16.g662600                           | -          | -                                              | Chloroplast homogeneous pyrenoid disenriched      | AR                                                                             | MAP16           | T1C04           | 371                              | 23                                |
| Cre16.g663450                           | LCI11      | Low-CO2-inducible membrane protein             | Chloroplast homogeneous with pyrenoid signal      | AR                                                                             | MAP3            | T1B12           | 284                              | 6                                 |
| Cre17.g721500                           | STA2       | Granule-bound starch synthase I                | Pyrenoid periphery spherical                      | AR                                                                             | MAP13           | T2F09           | 142                              | 1                                 |
| Cre17.g724300                           | PSAK       | Photosystem I reaction center subunit psaK     | Chloroplast not homogeneous with pyrenoid signal  | AR                                                                             | MAP34           | T3B09           | 319                              | 5                                 |
| Totals                                  |            |                                                |                                                   |                                                                                |                 |                 | 9451                             | 513                               |

**Table S4. Cre16.g655050 BLAST Results, Related to Figure 6**

Query cover is the percentage of the query sequence that matches the hit sequence. E-value is the expected value, the lower the E-value the more significant the hit.

| Accession      | Species                          | Query cover | E-value  | Identity |
|----------------|----------------------------------|-------------|----------|----------|
| XP_002950714.1 | <i>Volvox carteri</i>            | 77%         | 4.0E-137 | 56%      |
| KXZ52617.1     | <i>Gonium pectorale</i>          | 71%         | 9.0E-127 | 56%      |
| XP_005849673.1 | <i>Chlorella variabilis</i>      | 31%         | 2.0E-53  | 56%      |
| XP_005645512.1 | <i>Coccomyxa subellipsoidea</i>  | 28%         | 2.0E-50  | 55%      |
| XP_005847655.1 | <i>Chlorella variabilis</i>      | 27%         | 5.0E-48  | 53%      |
| XP_001698126.1 | <i>Chlamydomonas reinhardtii</i> | 10%         | 1.0E-29  | 100%     |
| XP_013896920.1 | <i>Monoraphidium neglectum</i>   | 16%         | 2.0E-29  | 60%      |
| XP_002501227.1 | <i>Micromonas commoda</i>        | 24%         | 1.0E-18  | 41%      |
| XP_003062310.1 | <i>Micromonas pusilla</i>        | 24%         | 2.0E-17  | 39%      |
