# Supplementary material
Source: PubMed Central journal article supplement (PMC5616186)

**A**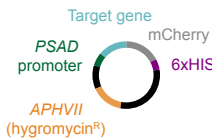**B**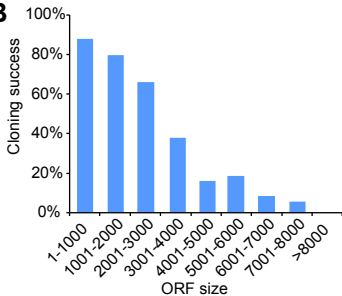**C**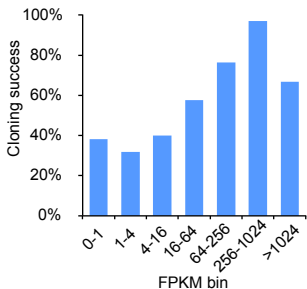**D**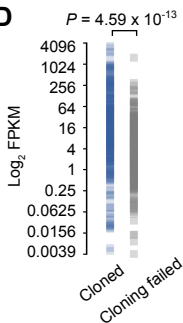**E**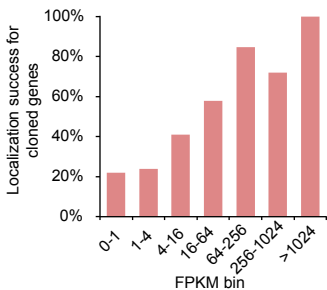**F**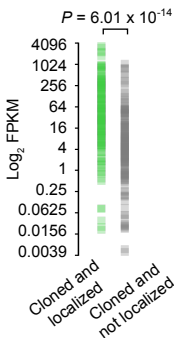**G**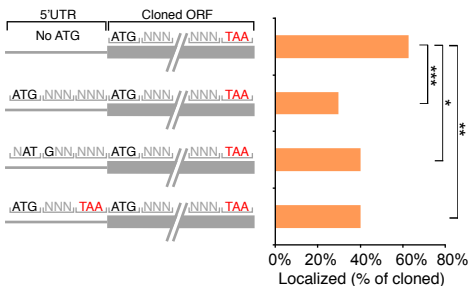

Supplement: NIHMS902488-supplement-FigureS1.pdf [file NIHMS902488-supplement-FigureS1.pdf]

**A**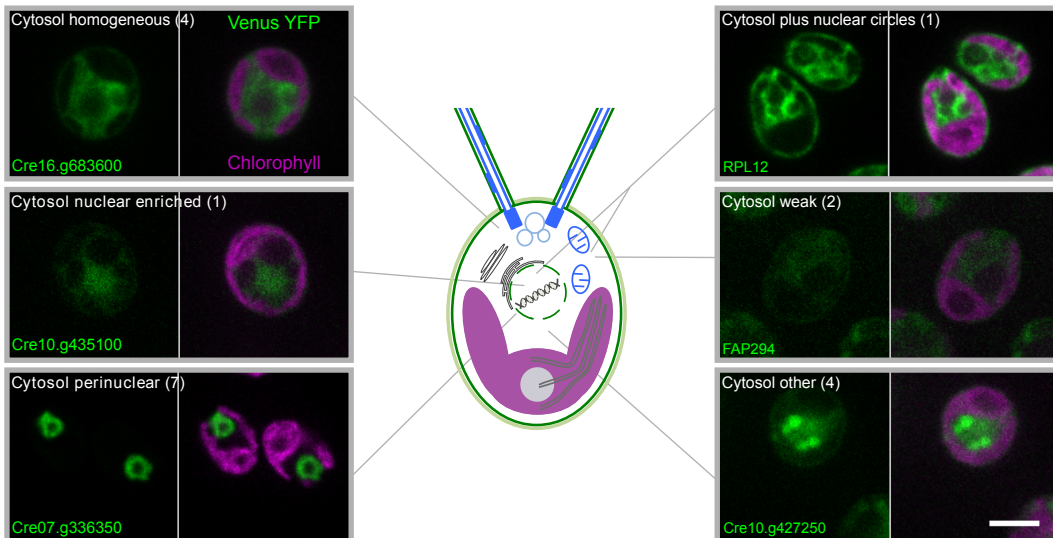**B**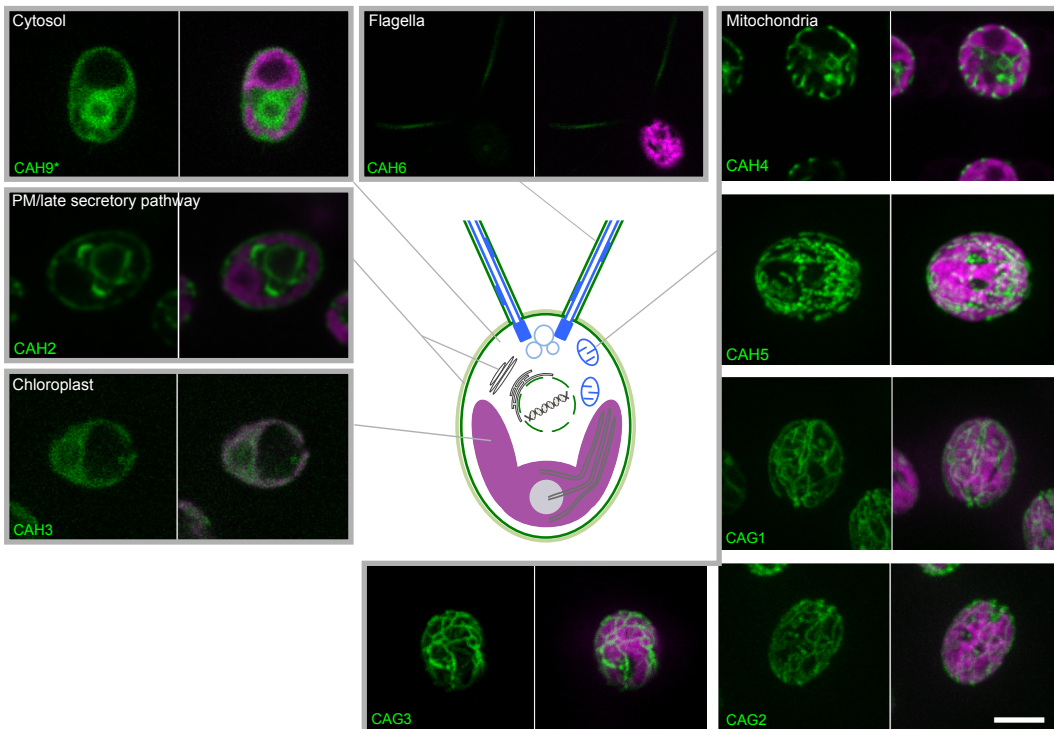

Supplement: NIHMS902488-supplement-FigureS2.pdf [file NIHMS902488-supplement-FigureS2.pdf]

**A**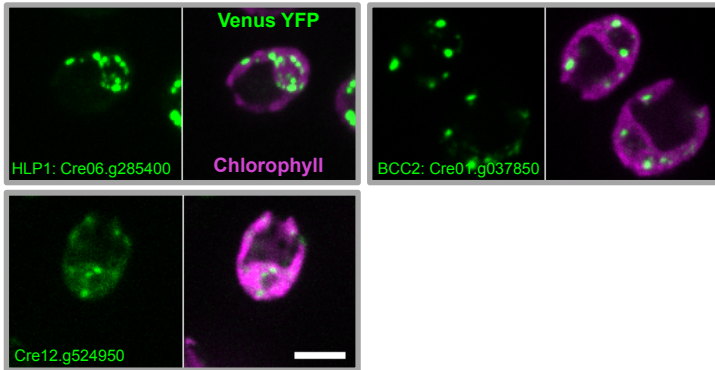**B**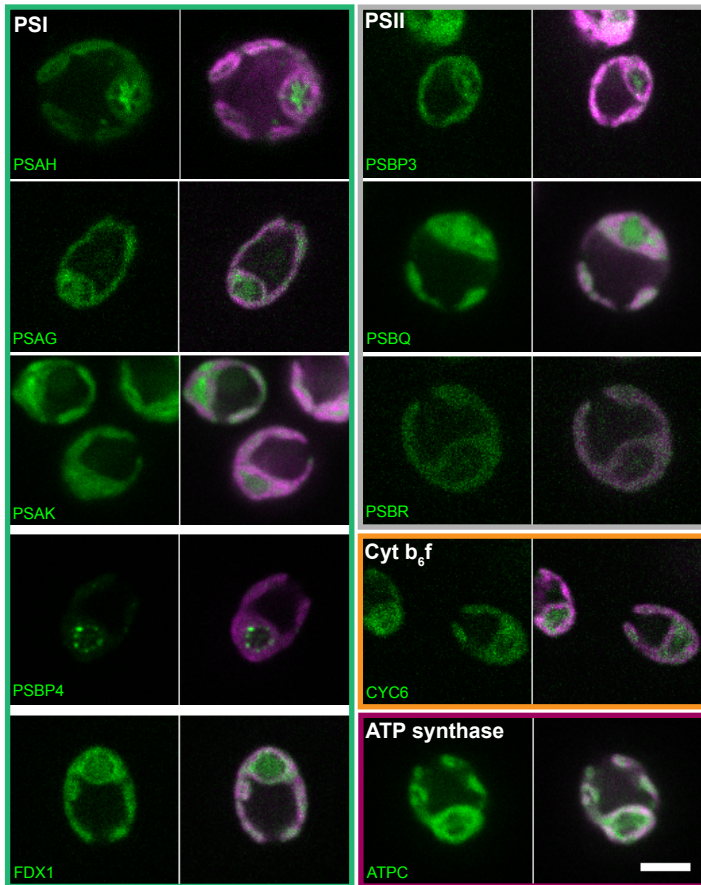

Supplement: NIHMS902488-supplement-FigureS3.pdf [file NIHMS902488-supplement-FigureS3.pdf]

# Chloroplast

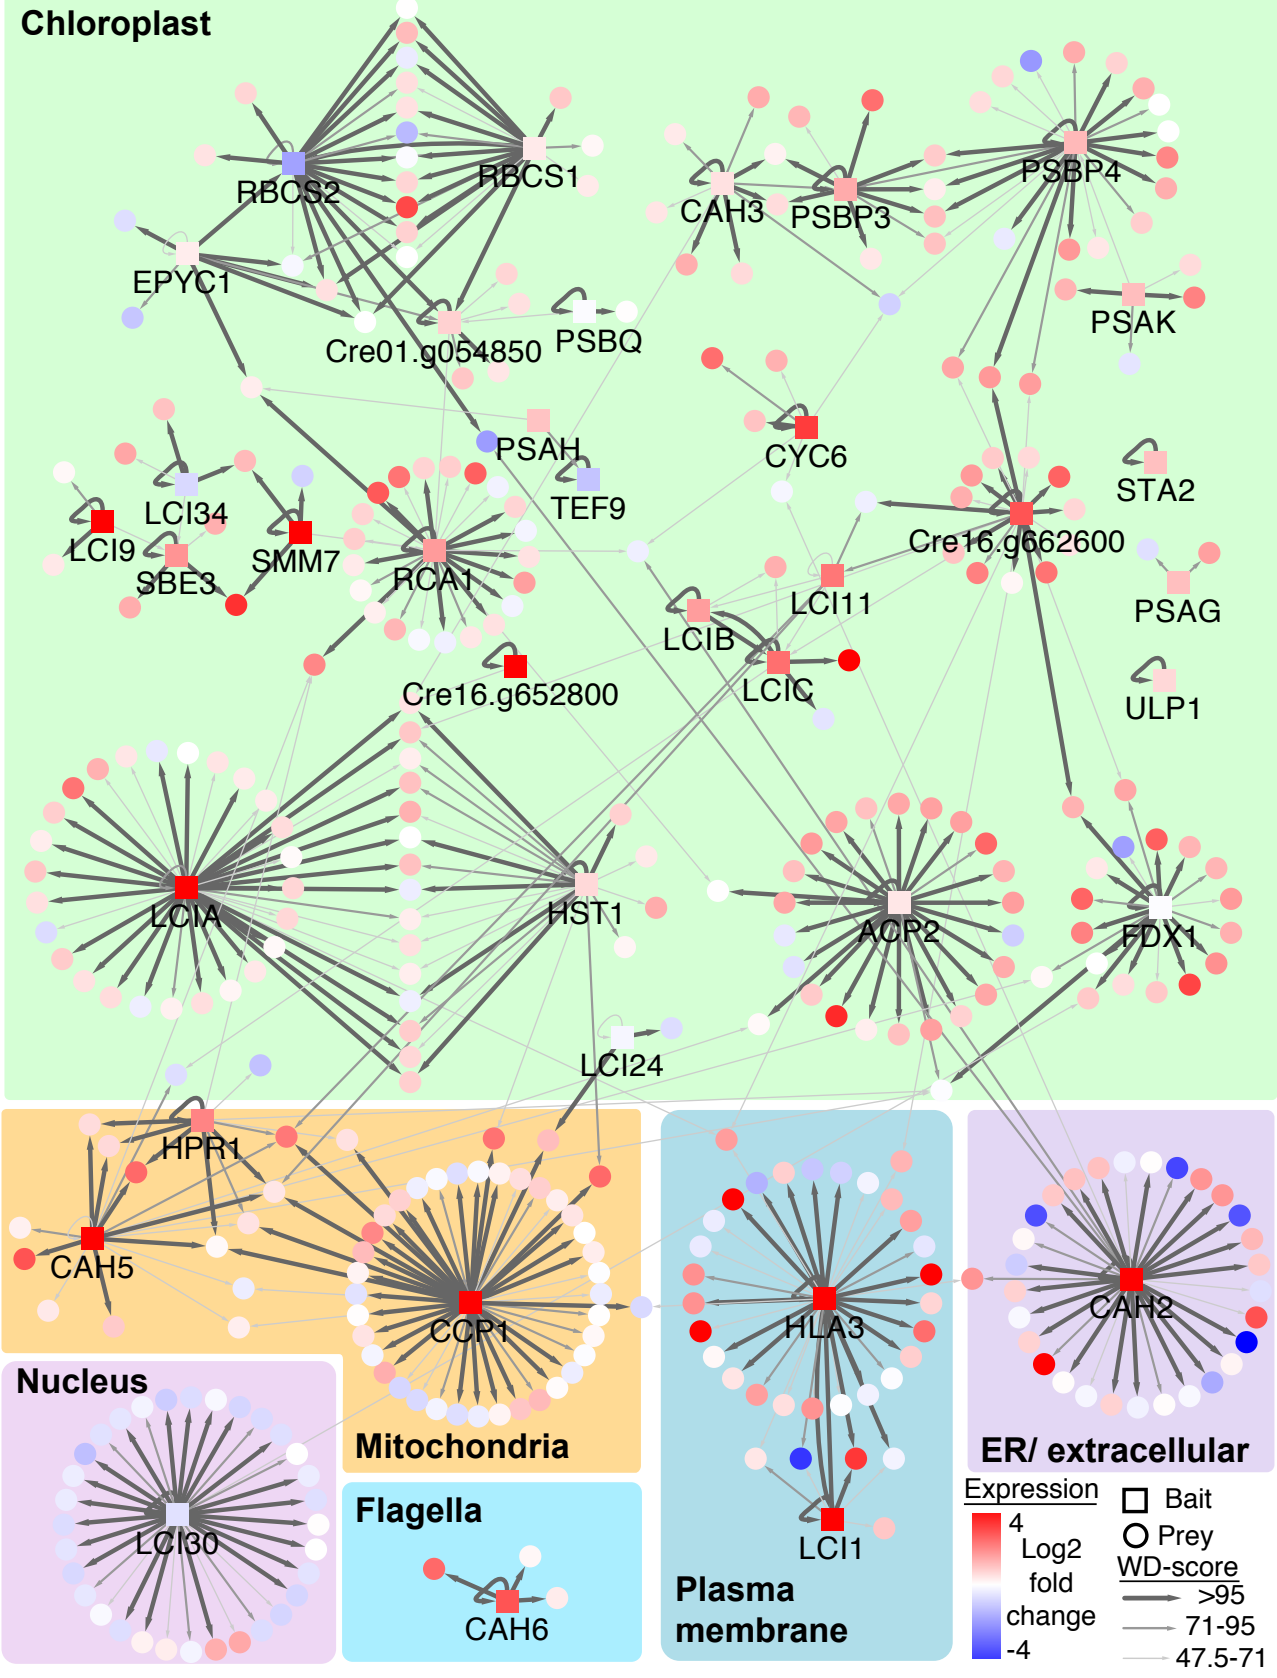

Supplement: NIHMS902488-supplement-FigureS4.pdf [file NIHMS902488-supplement-FigureS4.pdf]

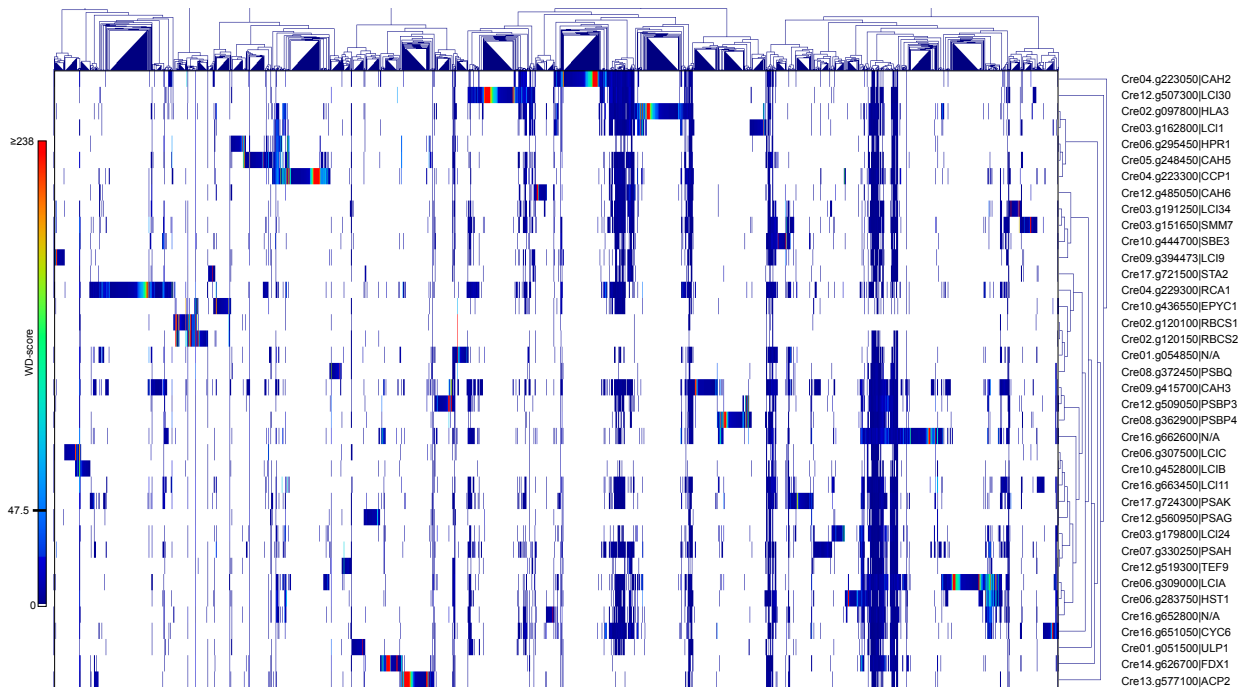

Supplement: NIHMS902488-supplement-FigureS5.pdf [file NIHMS902488-supplement-FigureS5.pdf]
